# Supplementary material for: Bone Mass and Osteoblast Activity Are Sex-Dependent in Mice Lacking the Estrogen Receptor α in Chondrocytes and Osteoblast Progenitor Cells
Source: MDPI journal article supplement (doi:10.3390/ijms23052902), 2022-03-07
Supplement: s1 [file s1]

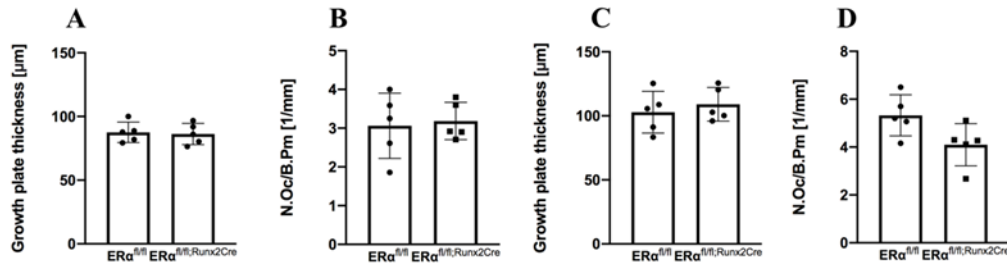

**Figure S1.** Femoral growth plate parameters of female and male ERα<sup>fl/fl</sup> and ERα<sup>fl/fl</sup>; Runx2<sup>Cre</sup> mice. (A) Growth plate thickness of female ERα<sup>fl/fl</sup> and ERα<sup>fl/fl</sup>; Runx2<sup>Cre</sup> mice, (B) osteoclast number per bone surface (OcS/B.Pm) of female mice at the growth plate, (C) growth plate thickness of male ERα<sup>fl/fl</sup> and ERα<sup>fl/fl</sup>; Runx2<sup>Cre</sup> mice, (D) osteoclast number per bone surface (OcS/B.Pm) of male mice at the growth plate. Data are shown as bar graphs (mean with SD), showing all data points. \* Indicates significant effects with  $p \leq 0.05$ .

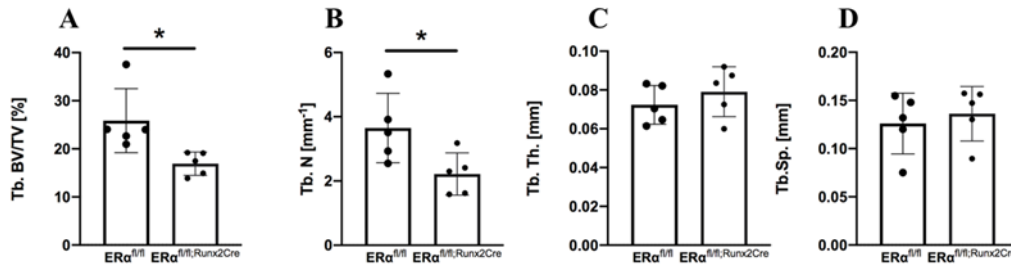

**Figure S2.** Bone microarchitecture parameters of the epiphyseal trabecular bone of the femur of female ERα<sup>fl/fl</sup> and ERα<sup>fl/fl</sup>; Runx2<sup>Cre</sup> mice. (A) Trabecular bone volume per tissue volume (Tb. BV/TV), (B) trabecular number (Tb. N), (C) trabecular thickness (Tb. Th.), (K) trabecular separation (Tb. Sp). Data are shown as bar graphs (mean with SD), showing all data points. \* Indicates significant effects with  $p \leq 0.05$ .
